# Supplementary material for: Automation for lateral flow rapid tests: Protocol for an open-source fluid handler and applications to dengue and African swine fever tests
Source: PubMed Central journal article supplement (PMC11588214; doi:10.1371/journal.pgph.0002625), 2024-11-25

download this map and full protocol at [rtWIZARD.lji.org](http://rtWIZARD.lji.org)

C6

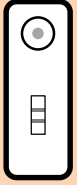

C5

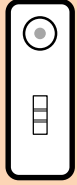

C4

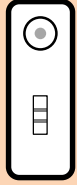

C3

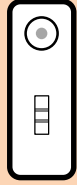

C2

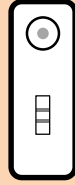

C1

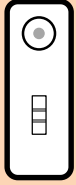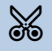

B6

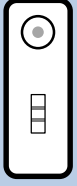

B5

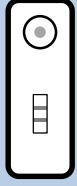

B4

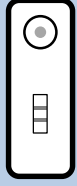

B3

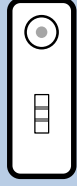

B2

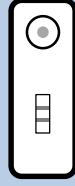

B1

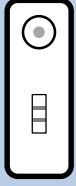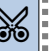

A6

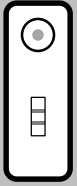

A5

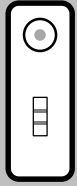

A4

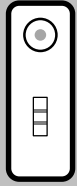

A3

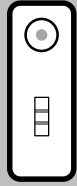

A2

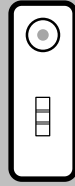

A1

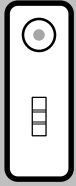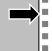

length of this black bar = 140mm

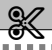

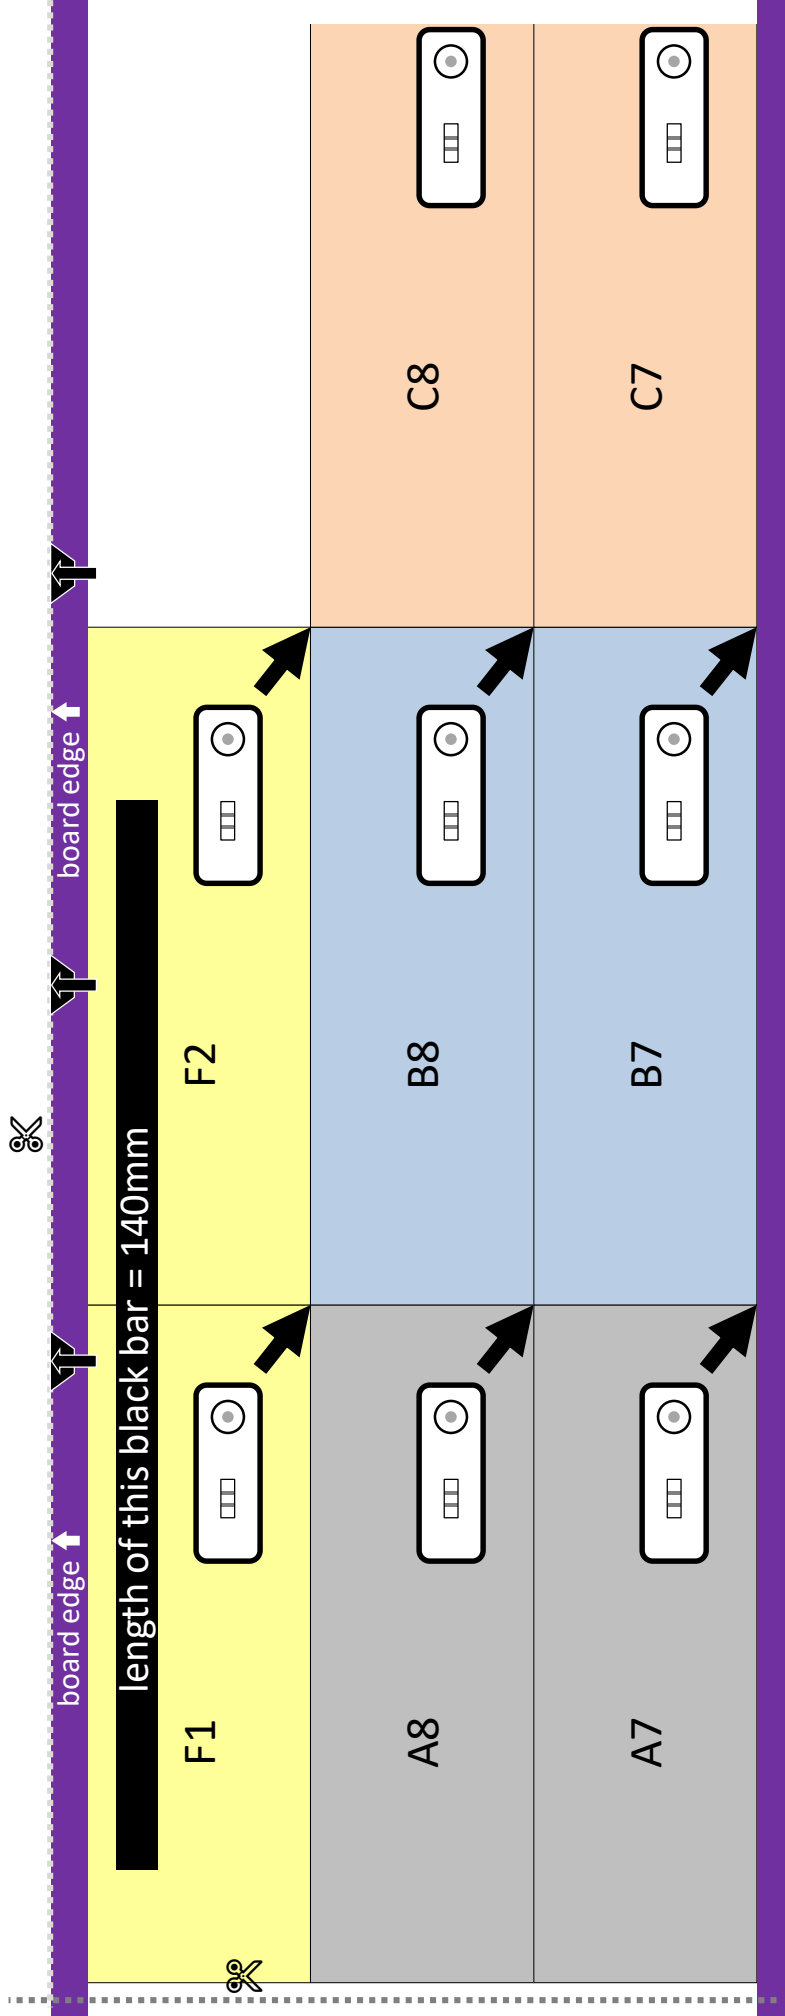

download this map and full protocol at [rtWIZARD.ljii.org](http://rtWIZARD.ljii.org)

C6

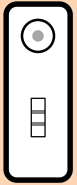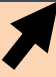

C5

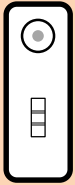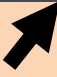

C4

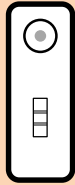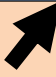

C3

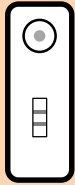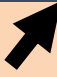

C2

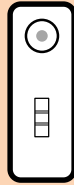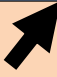

C1

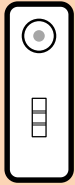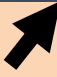

D6

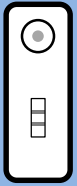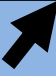

D5

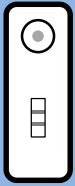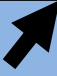

D4

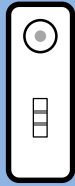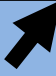

D3

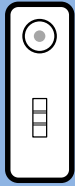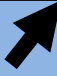

D2

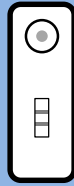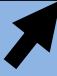

D1

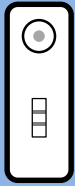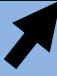

E6

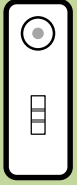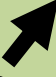

E5

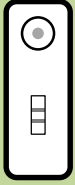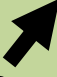

E4

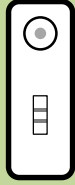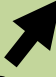

E3

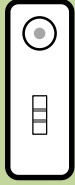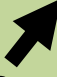

E2

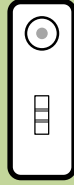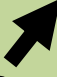

E1

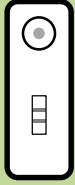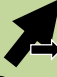

length of this black bar = 140mm

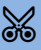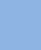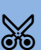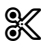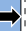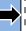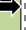

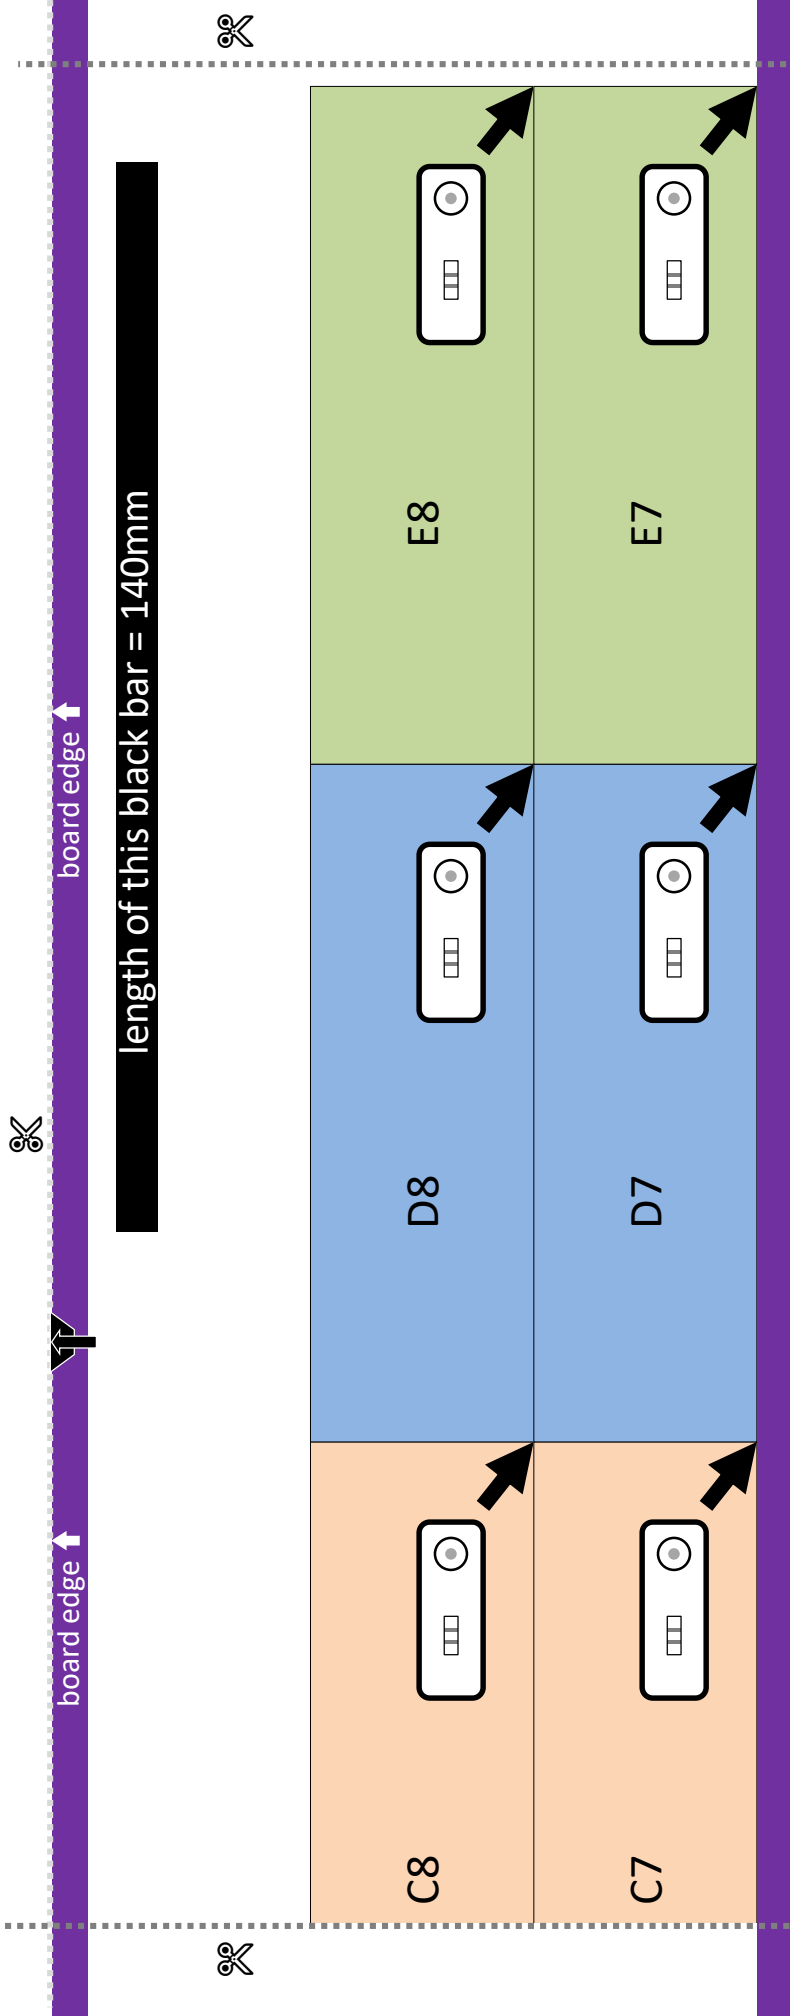

Supplement: pgph.0002625.s002.pdf [file pgph.0002625.s002.pdf]
