# Supplementary material for: Automation for lateral flow rapid tests: Protocol for an open-source fluid handler and applications to dengue and African swine fever tests
Source: PubMed Central journal article supplement (PMC11588214; doi:10.1371/journal.pgph.0002625), 2024-11-25
Supplement: pgph.0002625.s004.pdf [file pgph.0002625.s004.pdf]

Appendix 3

FOR RESEARCH USE ONLY / SÓLO PARA USO DE INVESTIGACIÓN / POUR USAGE DE RECHERCHE UNIQUEMENT / 仅供研究使用 / 研究用のみ / للاستخدام في البحوث فقط

| rtWIZARD Manual Plate Record for Two-Analyte Test |          |          |           |          |          |           |          |          |           |          |          |           |          |          |  |  |  |
|---------------------------------------------------|----------|----------|-----------|----------|----------|-----------|----------|----------|-----------|----------|----------|-----------|----------|----------|--|--|--|
| Sample ID                                         | Result 1 | Result 2 | Sample ID | Result 1 | Result 2 | Sample ID | Result 1 | Result 2 | Sample ID | Result 1 | Result 2 | Sample ID | Result 1 | Result 2 |  |  |  |
| <b>F1</b>                                         | +/-/∅    | +/-/∅    | <b>F2</b> | +/-/∅    | +/-/∅    |           |          |          |           |          |          |           |          |          |  |  |  |
| <b>A8</b>                                         | +/-/∅    | +/-/∅    | <b>B8</b> | +/-/∅    | +/-/∅    | <b>C8</b> | +/-/∅    | +/-/∅    | <b>D8</b> | +/-/∅    | +/-/∅    | <b>E8</b> | +/-/∅    | +/-/∅    |  |  |  |
| <b>A7</b>                                         | +/-/∅    | +/-/∅    | <b>B7</b> | +/-/∅    | +/-/∅    | <b>C7</b> | +/-/∅    | +/-/∅    | <b>D7</b> | +/-/∅    | +/-/∅    | <b>E7</b> | +/-/∅    | +/-/∅    |  |  |  |
| <b>A6</b>                                         | +/-/∅    | +/-/∅    | <b>B6</b> | +/-/∅    | +/-/∅    | <b>C6</b> | +/-/∅    | +/-/∅    | <b>D6</b> | +/-/∅    | +/-/∅    | <b>E6</b> | +/-/∅    | +/-/∅    |  |  |  |
| <b>A5</b>                                         | +/-/∅    | +/-/∅    | <b>B5</b> | +/-/∅    | +/-/∅    | <b>C5</b> | +/-/∅    | +/-/∅    | <b>D5</b> | +/-/∅    | +/-/∅    | <b>E5</b> | +/-/∅    | +/-/∅    |  |  |  |
| <b>A4</b>                                         | +/-/∅    | +/-/∅    | <b>B4</b> | +/-/∅    | +/-/∅    | <b>C4</b> | +/-/∅    | +/-/∅    | <b>D4</b> | +/-/∅    | +/-/∅    | <b>E4</b> | +/-/∅    | +/-/∅    |  |  |  |
| <b>A3</b>                                         | +/-/∅    | +/-/∅    | <b>B3</b> | +/-/∅    | +/-/∅    | <b>C3</b> | +/-/∅    | +/-/∅    | <b>D3</b> | +/-/∅    | +/-/∅    | <b>E3</b> | +/-/∅    | +/-/∅    |  |  |  |
| <b>A2</b>                                         | +/-/∅    | +/-/∅    | <b>B2</b> | +/-/∅    | +/-/∅    | <b>C2</b> | +/-/∅    | +/-/∅    | <b>D2</b> | +/-/∅    | +/-/∅    | <b>E2</b> | +/-/∅    | +/-/∅    |  |  |  |
| <b>A1</b>                                         | +/-/∅    | +/-/∅    | <b>B1</b> | +/-/∅    | +/-/∅    | <b>C1</b> | +/-/∅    | +/-/∅    | <b>D1</b> | +/-/∅    | +/-/∅    | <b>E1</b> | +/-/∅    | +/-/∅    |  |  |  |

Date: \_\_\_\_\_

Location: \_\_\_\_\_

Ambient temperature: \_\_\_\_\_

Humidity: \_\_\_\_\_

Operator: \_\_\_\_\_

Time fluid handler start: \_\_\_\_\_

Time fluid handler finish: \_\_\_\_\_

Test lot number(s): \_\_\_\_\_
