# Supplementary material for: Automation for lateral flow rapid tests: Protocol for an open-source fluid handler and applications to dengue and African swine fever tests
Source: PubMed Central journal article supplement (PMC11588214; doi:10.1371/journal.pgph.0002625), 2024-11-25
Supplement: pgph.0002625.s006.pdf [file pgph.0002625.s006.pdf]

**APPENDIX 5**

|  | <b>Source</b> | <b>Catalog</b> | <b>Quantity</b> | <b>Cost in 2023 (USD)</b> |
|--|---------------|----------------|-----------------|---------------------------|
|--|---------------|----------------|-----------------|---------------------------|

**SINGLE SOURCE**

|                                                  |           |           |      |      |
|--------------------------------------------------|-----------|-----------|------|------|
| OT-2 lab robot, P300 Single Channel GEN2 Pipette | Opentrons | NA        | 1    | 7750 |
| OT-2 Pipette Tips, 300µL, racked                 | Opentrons | 999-00009 | 9600 | 550  |
| OT-2 Pipette Tips, 300µL, loose                  | Opentrons | 999-00012 | 9600 | 330  |

**SUBSTITUTABLE**

|                                                     |          |             |         |         |
|-----------------------------------------------------|----------|-------------|---------|---------|
| Windows laptop with 512MB RAM, 300MB memory, 64-bit | Several  | Several     | 1       | 200     |
| Corning 3548 well plate                             | Corning  | 3548        | 100     | 541     |
| LABFISH Microcentrifuge MC-4S (8 tube capacity)     | Amazon   | B09YR69ZYF  | 1       | 60      |
| Pulsar G2319N Inverter Generator                    | Amazon   | B00YFT914I  | 1       | 349     |
| Greccell T-500 power station                        | Amazon   | B09ZKT5FQZ  | 1       | 357     |
| Tera 1D 2D QR Barcode Scanner                       | Amazon   | B07M68LS2N  | 1       | 60      |
| 1.1ml Micro serum separator tube                    | Sarstedt | 41.1378.005 | 100     | 67      |
| 1.3ml Micro Serum tube                              | Sarstedt | 41.1392.105 | 100     | 37      |
| 1.3ml Micro EDTA tube                               | Sarstedt | 41.1395.105 | 100     | 37      |
| 2ml centrifuge tube                                 | Several  | Several     | Several | Several |
| Avery 94102-WMF10 0.75 x 0.75" labels               | Amazon   | B0BLJ9S2ZB  | 2000    | 35      |
| Winco 12 x 18" Cutting Board                        | Amazon   | B001D3LQVA  | 1       | 8       |
| Adoric 0-6" Digital Caliper Measuring Tool          | Amazon   | B07DFFYCXS  | 1       | 9       |

**DESSICATORS**

|                                                  |         |            |         |         |
|--------------------------------------------------|---------|------------|---------|---------|
| (Chemical) DampRid - several sizes available     | Several | Several    | Several | Several |
| (Chemical) Wenko Portable Small Dehumidifier     | Amazon  | B0B8NDXDBF | 1       | 16      |
| (Battery) ProBreeze PB-04-US Dehumidifier        | Amazon  | B01DCF0T1Y | 1       | 16      |
| (110V Rechargeable) Hornady Dehumidifier 95900   | Amazon  | B07KCTRVMT | 1       | 28      |
| (110V or 12V) Eva-Dry Dehumidifier EDV-1100      | Amazon  | B000H0ZDD2 | 1       | 40      |
| (110V or 12V) Eva-Dry Mini Dehumidifier EDV-1200 | Amazon  | B085HHJZRM | 1       | 60      |
| (120V) Caframo SEEKR Stor-Dry Air Circulator     | Amazon  | B0009L675W | 1       | 91      |
